# Supplementary material for: [H3N(CH2)7NH3]8(CH3NH3)2Sn(iv)Sn(ii)12I46? a mixed-valent hybrid compound with a uniquely templated defect-perovskite structure
Source: Royal Society of Chemistry journal article supplement (doi:10.1039/b411322e), 2004-11-19
Supplement: b411322e.pdf [file b411322e.pdf]

# Supplementary Material (ESI) for Chemical Communications  
# This journal is © The Royal Society of Chemistry 2005

**[H<sub>3</sub>N(CH<sub>2</sub>)<sub>7</sub>NH<sub>3</sub>]<sub>8</sub>(CH<sub>3</sub>NH<sub>3</sub>)<sub>2</sub> Sn(IV)Sn(II)<sub>12</sub>I<sub>46</sub> - A Mixed-valent Hybrid  
Compound with a Uniquely Templated Defect-Perovskite  
Structure**

Jun Guan, Zhongjia Tang and Arnold M. Guloy\*

*Department of Chemistry and the Center for Materials Chemistry, University of Houston, Houston, TX  
77204-5003*

*(Supplementary Material)*

**Table 1S. Crystal data and structure refinement for (1).**

|                                   |                                                                                   |
|-----------------------------------|-----------------------------------------------------------------------------------|
| Empirical formula                 | C <sub>58</sub> H <sub>172</sub> I <sub>46</sub> N <sub>18</sub> Sn <sub>13</sub> |
| Formula weight                    | 8502.51                                                                           |
| Temperature                       | 223(2) K                                                                          |
| Wavelength                        | 0.71073 Å                                                                         |
| Crystal system                    | Tetragonal                                                                        |
| Space group                       | P4 <sub>2</sub> /mmm                                                              |
| Unit cell dimensions              | a = 26.9174(13) Å<br>b = 26.9174(13) Å<br>c = 12.7329(9) Å                        |
| Volume                            | 9225.6(9) Å <sup>3</sup>                                                          |
| Z                                 | 2                                                                                 |
| Density (calculated)              | 3.061 g/m <sup>3</sup>                                                            |
| Absorption coefficient            | 9.455 mm <sup>-1</sup>                                                            |
| F(000)                            | 7468                                                                              |
| Crystal size                      | 0.36 x 0.32 x 0.30 mm                                                             |
| Theta range for data collection   | 1.07 to 25.04°                                                                    |
| Index ranges                      | -25 ≤ h ≤ 32, -32 ≤ k ≤ 32, -15 ≤ l ≤ 13                                          |
| Reflections collected             | 47031                                                                             |
| Independent reflections           | 4411 [R(int) = 0.0393]                                                            |
| Refinement method                 | Full-matrix least-squares on F <sup>2</sup>                                       |
| Data / restraints / parameters    | 4399 / 15 / 139                                                                   |
| Goodness-of-fit on F <sup>2</sup> | 1.223                                                                             |
| Final R indices [I > 2σ(I)]       | R1 = 0.0527, wR2 = 0.1102                                                         |
| R indices (all data)              | R1 = 0.0689, wR2 = 0.1320                                                         |
| Extinction coefficient            | 0.000376(9)                                                                       |
| Largest diff. peak and hole       | 1.192 and -1.345 e. Å <sup>-3</sup>                                               |

**Table 2S. Atomic coordinates ( $\times 10^4$ ) and equivalent isotropic displacement parameters ( $\text{\AA}^2 \times 10^3$ ) for (1).**

|       | x        | y        | z         | U(eq)   |
|-------|----------|----------|-----------|---------|
| Sn(1) | 3476(1)  | 3476(1)  | 5000      | 51(1)   |
| Sn(2) | 3281(1)  | 3281(1)  | 0         | 39(1)   |
| Sn(3) | 0        | 0        | -5000     | 45(1)   |
| Sn(4) | 79(1)    | 3300(1)  | -5000     | 38(1)   |
| Sn(5) | 41(1)    | 3329(1)  | 0         | 39(1)   |
| I(1)  | 3439(1)  | 3439(1)  | 2473(1)   | 85(1)   |
| I(2)  | 2539(1)  | 2539(1)  | 0         | 77(1)   |
| I(3)  | 4269(1)  | 2599(1)  | 5000      | 76(1)   |
| I(4)  | 4102(1)  | 2443(1)  | 0         | 76(1)   |
| I(5)  | 747(1)   | 747(1)   | -5000     | 74(1)   |
| I(6)  | 0        | 0        | -2783(2)  | 99(1)   |
| I(7)  | 9(1)     | 3352(1)  | -2504(1)  | 68(1)   |
| I(8)  | 952(1)   | 2740(1)  | 0         | 72(1)   |
| I(9)  | 685(1)   | 4286(1)  | 0         | 67(1)   |
| I(10) | 927(1)   | 4019(1)  | -5000     | 72(1)   |
| I(11) | 674(1)   | 2391(1)  | -5000     | 71(1)   |
| I(12) | 4218(1)  | 4218(1)  | 5000      | 88(1)   |
| I(13) | -763(1)  | 763(1)   | -5000     | 112(1)  |
| N(1)  | 1413(6)  | 3634(6)  | 2097(14)  | 137(6)  |
| C(1)  | 1854(8)  | 3416(8)  | 2623(18)  | 139(8)  |
| C(2)  | 1716(10) | 2899(9)  | 2937(28)  | 230(16) |
| C(3)  | 2118(13) | 2675(11) | 3511(28)  | 282(21) |
| C(4)  | 2159(14) | 2159(14) | 3217(51)  | 309(34) |
| N(2)  | 1921(9)  | -230(9)  | -2824(21) | 228(12) |
| C(5)  | 1497(11) | -16(11)  | -2446(28) | 236(17) |
| C(6)  | 1586(13) | 398(11)  | -1731(26) | 257(18) |
| C(7)  | 1515(13) | 861(10)  | -2106(26) | 232(16) |
| C(8)  | 1186(15) | 1186(15) | -1473(44) | 294(31) |
| N(3)  | 0        | 000      | 2500      | 203(21) |
| C(9)  | -333(24) | 5336(24) | 3033(57)  | 111(24) |

U(eq) is defined as one third of the trace of the orthogonalized  $U_{ij}$  tensor.

**Table 3S. Relevant Bond lengths [Å] and angles [°] for (1).**

---

|                     |            |
|---------------------|------------|
| Sn(1)-I(12)         | 2.823(3)   |
| Sn(1)-I(3)#1        | 3.1815(12) |
| Sn(1)-I(3)          | 3.1815(12) |
| Sn(1)-I(1)#2        | 3.2208(14) |
| Sn(1)-I(1)          | 3.2208(14) |
| Sn(2)-I(2)          | 2.826(2)   |
| Sn(2)-I(4)#3        | 3.1577(12) |
| Sn(2)-I(4)          | 3.1577(12) |
| Sn(2)-I(1)          | 3.206(2)   |
| Sn(2)-I(1)#4        | 3.206(2)   |
| Sn(3)-I(6)#5        | 2.823(2)   |
| Sn(3)-I(6)          | 2.823(2)   |
| Sn(3)-I(5)#5        | 2.905(2)   |
| Sn(4)-I(11)         | 2.924(2)   |
| Sn(4)-I(10)         | 2.993(2)   |
| Sn(4)-I(7)          | 3.108(2)   |
| Sn(5)-I(7)#4        | 3.1897(8)  |
| Sn(5)-I(7)          | 3.1897(8)  |
| N(1)-C(1)           | 1.44(3)    |
| C(4)-C(3)#7         | 1.44(3)    |
| N(2)-C(5)           | 1.37(2)    |
| C(5)-C(6)           | 1.46(2)    |
| C(6)-C(7)           | 1.35(2)    |
| C(7)-C(8)           | 1.48(2)    |
| C(8)-C(7)#7         | 1.48(2)    |
| N(3)-C(9)#8         | 1.44(3)    |
| N(3)-C(9)           | 1.44(3)    |
| N(3)-C(9)#9         | 1.44(3)    |
| N(3)-C(9)#10        | 1.44(3)    |
| I(12)-Sn(1)-I(3)#1  | 92.90(5)   |
| I(12)-Sn(1)-I(3)    | 92.90(5)   |
| I(3)#1-Sn(1)-I(3)   | 174.21(9)  |
| I(12)-Sn(1)-I(1)#2  | 92.48(5)   |
| I(3)#1-Sn(1)-I(1)#2 | 89.875(4)  |
| I(3)-Sn(1)-I(1)#2   | 89.875(4)  |
| I(12)-Sn(1)-I(1)    | 92.48(5)   |
| I(3)#1-Sn(1)-I(1)   | 89.875(4)  |
| I(3)-Sn(1)-I(1)     | 89.875(4)  |
| I(1)#2-Sn(1)-I(1)   | 175.04(10) |
| I(2)-Sn(2)-I(4)#3   | 89.38(4)   |
| I(2)-Sn(2)-I(4)     | 89.38(4)   |
| I(4)#3-Sn(2)-I(4)   | 178.76(8)  |
| I(2)-Sn(2)-I(1)     | 100.83(4)  |
| I(4)#3-Sn(2)-I(1)   | 90.117(8)  |
| I(4)-Sn(2)-I(1)     | 90.117(8)  |
| I(2)-Sn(2)-I(1)#4   | 100.83(4)  |
| I(4)#3-Sn(2)-I(1)#4 | 90.117(8)  |
| I(4)-Sn(2)-I(1)#4   | 90.117(8)  |
| I(1)-Sn(2)-I(1)#4   | 158.34(8)  |
| I(6)#5-Sn(3)-I(6)   | 180.0      |
| I(6)#5-Sn(3)-I(5)#5 | 90.0       |

# Supplementary Material (ESI) for Chemical Communications  
# This journal is © The Royal Society of Chemistry 2005

|                      |           |
|----------------------|-----------|
| I(6)-Sn(3)-I(5)#5    | 90.0      |
| I(6)#5-Sn(3)-I(5)    | 90.0      |
| I(6)-Sn(3)-I(5)      | 90.0      |
| I(5)#5-Sn(3)-I(5)    | 180.0     |
| I(6)#5-Sn(3)-I(13)   | 90.0      |
| I(6)-Sn(3)-I(13)     | 90.0      |
| I(5)#5-Sn(3)-I(13)   | 90.0      |
| I(5)-Sn(3)-I(13)     | 90.0      |
| I(6)#5-Sn(3)-I(13)#5 | 90.0      |
| I(6)-Sn(3)-I(13)#5   | 90.0      |
| I(5)#5-Sn(3)-I(13)#5 | 90.0      |
| I(5)-Sn(3)-I(13)#5   | 90.0      |
| I(13)-Sn(3)-I(13)#5  | 180.0     |
| I(11)-Sn(4)-I(10)    | 97.07(5)  |
| I(11)-Sn(4)-I(7)     | 93.96(3)  |
| I(10)-Sn(4)-I(7)     | 90.96(3)  |
| I(11)-Sn(4)-I(7)#6   | 93.96(3)  |
| I(10)-Sn(4)-I(7)#6   | 90.96(3)  |
| I(7)-Sn(4)-I(7)#6    | 171.56(5) |
| I(8)-Sn(5)-I(9)      | 88.92(5)  |
| I(8)-Sn(5)-I(7)#4    | 91.90(3)  |
| I(9)-Sn(5)-I(7)#4    | 89.90(3)  |
| I(8)-Sn(5)-I(7)      | 91.90(3)  |
| I(9)-Sn(5)-I(7)      | 89.90(3)  |
| I(7)#4-Sn(5)-I(7)    | 176.19(5) |
| Sn(2)-I(1)-Sn(1)     | 171.65(8) |
| Sn(4)-I(7)-Sn(5)     | 173.87(5) |
| N(1)-C(1)-C(2)       | 107(2)    |
| C(3)-C(2)-C(1)       | 110(2)    |
| C(2)-C(3)-C(4)       | 109(2)    |
| C(3)-C(4)-C(3)#7     | 94(4)     |
| N(2)-C(5)-C(6)       | 114(3)    |
| C(7)-C(6)-C(5)       | 118(3)    |
| C(6)-C(7)-C(8)       | 116(3)    |
| C(7)#7-C(8)-C(7)     | 114(5)    |
| C(9)#8-N(3)-C(9)     | 103(3)    |
| C(9)#8-N(3)-C(9)#9   | 103(3)    |
| C(9)-N(3)-C(9)#9     | 124(6)    |
| C(9)#8-N(3)-C(9)#10  | 124(6)    |
| C(9)-N(3)-C(9)#10    | 103(3)    |
| C(9)#9-N(3)-C(9)#10  | 103(3)    |

---

Symmetry transformations used to generate equivalent atoms:

#1 y,x,-z+1 #2 x,y,-z+1 #3 y,x,-z #4 x,y,-z  
#5 -x,-y,-z-1 #6 x,y,-z-1 #7 y,x,z  
#8 -y+1/2,x+1/2,-z+1/2 #9 -x,-y+1,z #10 y-1/2,-x+1/2,-z+1/2

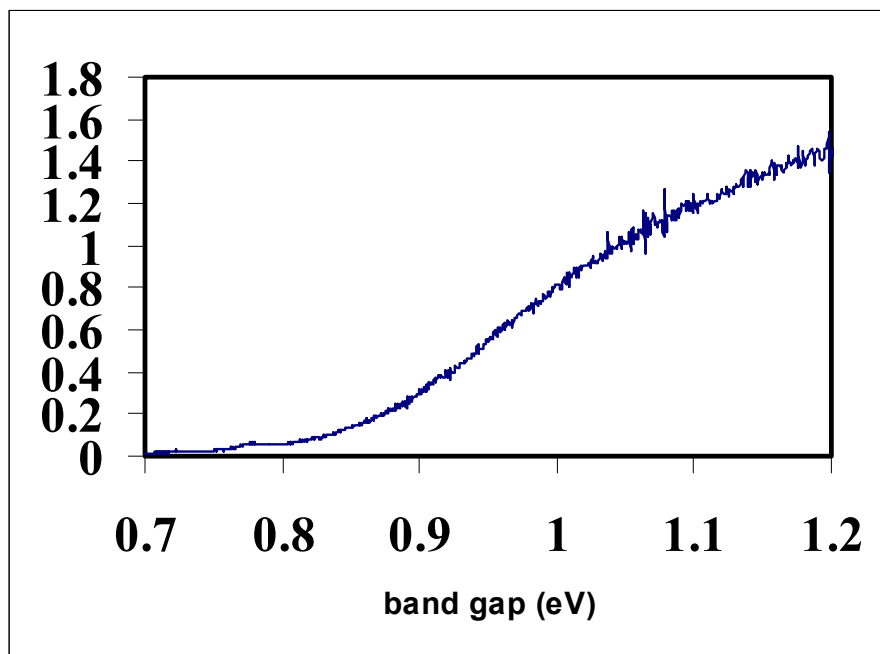

**Figure 1S.** Reflectance spectrum -  $(\alpha/S)^2$  versus band gap  $\Delta E$  - of compound (1).
